# Supplementary material
Source: PubMed Central journal article supplement (PMC4108183)
Supplement: bi500650h_si_001.pdf [file bi500650h_si_001.pdf]

## **SUPPORTING INFORMATION**

# **Biosynthesis of a Central Intermediate in Hydrogen Sulfide Metabolism by a Novel Human Sulfurtransferase and its Yeast Ortholog**

Scott L. Melideo<sup>§</sup>, Michael R. Jackson<sup>§</sup>,

and Marilyn Schuman Jorns\*

Department of Biochemistry and Molecular Biology

Drexel University College of Medicine

Philadelphia, PA 19102

\*To whom requests for reprints should be addressed. Phone: (215) 762-7495 FAX: (215) 762-4452; E-mail: [marilyn.jorns@drexelmed.edu](mailto:marilyn.jorns@drexelmed.edu)

Table S1 Primers used for PCR reactions

| Reaction                                                                                   | Primers                                                                                    |
|--------------------------------------------------------------------------------------------|--------------------------------------------------------------------------------------------|
| Amplification of the <i>RDL1</i> gene from <i>S. cerevisiae</i> genomic DNA                | 5'- GCTAGCCATATGTGGAAGGCCGTGATGAATG-3'<br>5'- CCTAGAGTATACTCGAGTAAGTCAAGTTTATCACCC-3'      |
| Ligation-independent cloning of an optimized synthetic gene encoding human TSTD1 isoform 1 | 5'-AGATTGGTGGCATGGCCGGGGCGCCG-3'<br>5'-GAGGAGAGTTTAGACTCACGACTCCTTCTCCAG-3'                |
| Ligation-independent cloning of an optimized synthetic gene encoding human TSTD1 isoform 2 | 5'-AGATTGGTGGCATGGCAGGTGTTAGTG-3'<br>5'-GAGGAGAGTTTAGACTCAGGATTCTTTTTCTAACC-3'             |
| Ligation-independent cloning of an optimized synthetic gene encoding human TSTD1 isoform 3 | 5'-AGATTGGTGGCATGGCCGGAGCCCC-3'<br>5'-GAGGAGAGTTTAGACTCAGCGACCTGCTAATAAC-3'                |
| Mutation of Cys98 to Ala in yeast RDL1                                                     | 5'-GGAGCTAATATTTTATGCTGCTTCTGGCAAACGCG-3'<br>5'-GCGGTTTGCCAGAAGCAGCATAAAAATATTAGCTCC-3'    |
| Mutation of Cys98 to Ser in yeast RDL1                                                     | 5'- GGAGCTAATATTTTATTGTGCTTCTGGCAAACGCG -3'<br>5'- CGCGYYYGCCAGAAGCACAATAAAAATATTAGCTCC-3' |
| Mutation of Cys79 to Ala in human TSTD1 isoform 1                                          | 5'- CATCTGGTTTTTTTCGCACAGATGGGTAAACGC-3'<br>5'-GCGTTTACCCATCTGTGCGAAAAAACCAGATG-3'         |
| Mutation of Cys79 to Ser in human TSTD1 isoform 1                                          | 5'- CATCTGGTTTTTTTCTCTCAGATGGGTAAACGC-3'<br>5'- GCGTTTACCCATCTGAGAGAAAAAACCAGATG-3'        |

Table S2 BLASTp Search of the Bacterial Proteomes that Contain SDO-TSTD1 Fusion Proteins Using Human SQOR as the Query Sequence

|    | Organism (Taxonomy ID)                      | Highest Scoring Blast Hit             |                    |                    |                 |                                        |
|----|---------------------------------------------|---------------------------------------|--------------------|--------------------|-----------------|----------------------------------------|
|    |                                             | GenBank accession number<br>(remarks) | Query<br>Cover (%) | E<br>Value         | Identity<br>(%) | Distance<br>(nucleotides) <sup>a</sup> |
| 1  | <i>Nitrosococcus oceani</i> (1229)          | YP_343998.1                           | 88                 | 4e <sup>-144</sup> | 42              | 73                                     |
| 2  | <i>Nitrosococcus watsonii</i> (473531)      | YP_003760988.1                        | 88                 | 5e <sup>-111</sup> | 42              | 73                                     |
| 3  | <i>Methylocella silvestris</i> (199596)     | (no hit obtained)                     | -                  | -                  | -               | -                                      |
| 4  | <i>Methylobacter tundripaludum</i> (173365) | WP_006892758.1                        | 87                 | 1e <sup>-114</sup> | 42              | 21                                     |
| 5  | <i>Methylomicrobium album</i> (39775)       | WP_005371245.1                        | 87                 | 4e <sup>-111</sup> | 41              | 45                                     |
| 6  | <i>Methyloglobulus morosus</i> (1410681)    | WP_023495229.1                        | 86                 | 5e <sup>-115</sup> | 42              | 113                                    |
| 7  | <i>Methylocystis rosea</i> (173366)         | WP_018406351.1                        | 51                 | 1e <sup>-10</sup>  | 27              | nd                                     |
| 8  | <i>Methylosarcina fibrata</i> (105972)      | WP_020565271.1                        | 87                 | 7e <sup>-112</sup> | 41              | 246                                    |
| 9  | <i>Bradyrhizobiaceae bacterium</i> (709797) | WP_009735658.1                        | 67                 | 0.001              | 22              | nd                                     |
| 10 | <i>Afipia broomeae</i> (56946)              | WP_006019594.1                        | 65                 | 3e <sup>-6</sup>   | 22              | nd                                     |
| 11 | <i>γ-proteobacterium HTCC2148</i> (247634)  | (bacterial proteome unavailable)      | -                  | -                  | -               | -                                      |
| 12 | <i>Rhizobium giardinii</i> (56731)          | WP_018327723.1                        | 86                 | 5e <sup>-90</sup>  | 35              | nd                                     |
| 13 | <i>Mesorhizobium amorphae</i> (71433)       | WP_006203294.1                        | 79                 | 2e <sup>-23</sup>  | 26              | nd                                     |

<sup>a</sup>The indicated distance is determined based on the number of intervening nucleotides between the human SQOR homolog gene and the SDO-TSTD1 fusion protein gene in the bacterial chromosome. Complete genomic data are available only for *N. oceani* and *N. watsonii*. Genomic distances in other bacteria, where whole-genome shotgun contigs are available, could be determined when the genes for the SQOR homolog and the SDO-TSTD1 fusion protein were found in the same contig but not when the genes were located in different contigs (nd).

```

M A G A P T V S L P E L R S L L A S G R 20
atggctggagcgcaccacggctctcgcttctctgaactccggttcaactcctagcctccggacgg
|||||.|||.|||||.|||||.|||||.|||||.|||||.|||||.|||||.|||||.
ATGGCCGGGGCGCCGACGGTGTCCCTCCCGAGCTTCGCTCTCTGCTCGCCTCTGGCCGT

A R L F D V R S R E E A A A G T I P G A 40
gccccgctcttcgacgtgcgctctcgcgagggagggcagctgggaccatcccaggggcg
||.|||||.|||.|||||.|||||.|||||.|||||.|||||.|||||.|||||.|||||.
GCTCGGTTGTTTGATGTGCGTAGCCGGAAGAAGCGGCGGCAGGAACAATCCGGGTGCT

L N I P V S E L E S A L O M E P A A F Q 60
ctcaacatcccgggtgtccgagttggagagtgctctgcagatggagccagctgccttccag
|||||.|||||.|||||.|||||.|||||.|||||.|||||.|||||.|||||.|||||.
CTCAACATCCCAGGTAAGTGAGCTCGAATCTGCTCTCCAATGGAACCGGCCGCGTTTTAG

A L Y S A E K P K L E D E H L V F F C Q 80
gcttatattctgctgagaagccaaagctggaagatgagcatctcgttttcttctgtcag
||.|||||.|||.|||||.|||||.|||||.|||||.|||||.|||||.|||||.|||||.
GCATTGTAICTAGCGGAGAAACCGAAACTGGAAGACGAACATCTGGTTTTTTCTGCCAG

M G K R G L Q A T Q L A R S L G Y T G A 100
atgggcaagcggggcctccaggccacgcagctggccccggagtcttgatacaactggggct
|||||.|||.|||||.|||||.|||||.|||||.|||||.|||||.|||||.|||||.
ATGGGTAAACCGGACTGCAAGCCACGCAGCTGGCAGCTCCCTGGTTATACCGGTGCT

R N Y A G A Y R E W L E K E S 115
cgcaactacgctggagcctatagagaatggttgagaaagagagt
||.|||||.|||||.|||||.|||||.|||||.|||||.|||||.|||||.|||||.
CGTAACTATGCGGGTGCCTATCGCGAATGGCTGGAGAAGGAGTCG

```

Figure S1 The nucleotide sequence of the synthetic gene used to express recombinant TSTD1 isoform 1 (upper case) is compared with the original gene sequence (lower case). The top line shows the amino acid sequence of isoform 1.

```

M A G V S E L E S A L Q M E P A A F Q A      20
atggctggagtgccgagttggagagtgctctgcagatggagccagctgccttccaggct
|||||.|||.|||.|||.|||.|||.|||.|||.|||.|||.|||.|||.|||.|||.|||.
ATGGCAGGTGTTAGTGAATTAGAATCCGCATTACAAATGGAACCGGCAGCATTTC AAGCT

L Y S A E K P K L E D E H L V F F C Q M      40
ttatattctgctgagaagccaaagctggaagatgagcatctcgttttcttctgtcagatg
|||||.|||.|||.|||.|||.|||.|||.|||.|||.|||.|||.|||.|||.|||.|||.
TTATACTCAGCAGAAAAACCGAAATTAGAAGATGAACACTTAGTATTTTTTTGTCAAATG

G K R G L Q A T Q L A R S L G Y T G A R      60
ggcaagcggggcctccaggccacgcagctggcccggagtcttggatacaactggggctcgc
|||.|||.|||.|||.|||.|||.|||.|||.|||.|||.|||.|||.|||.|||.|||.
GGAAAACGTGGTTTACAAGCAACTCAATTAGCACGCTCATTAGGATACACAGGCGCTCGG

N Y A G A Y R E W L E K E S      74
aactacgctggagcctatagagaatggttggagaaagagagt
|||.|||.|||.|||.|||.|||.|||.|||.|||.|||.|||.|||.|||.|||.|||.
AATTATGCAGGGGCTTATCGCGAATGGTTAGAAAAAGAATCC

```

Figure S2 The nucleotide sequence of the synthetic gene used to express recombinant TSTD1 isoform 2 (upper case) is compared with the original gene sequence (lower case). The top line shows the amino acid sequence of isoform 2.

```

M A G A P T V S L P E L R S L L A S G R      20
atggctggagcgcccacgggtctcgcttccctgaactccggttccactcctagcctccggaagg
|||||.|||||.|||.|||||.|||.|||||.|||.|||||.|||.|||||.|||.|||||.
ATGGCCGGAGCCCCTACAGTCTCTTTACCAGAATTACGCTCATTATTAGCATCAGGCCGT

A R L F D V R S R E E A A A G T I P G A      40
gcccggtctctcgacgtgogctctcgcgaggaggcggcagctgggaccatcccagggggcg
|||||.|||||.|||||.|||||.|||||.|||||.|||||.|||||.|||||.|||||.
GCCCGCCTTTTTGACGTACGTTCCGCGAAGAAGCCGCAGCAGGAACCATCCCAGGAGCT

L N I P V S E L E S A L O M E P A A F Q      60
ctcaacatcccgggtgtccgagttggagagtgctctgcagatggagccagctgccttccag
.|.|||||.|||||.|||||.|||||.|||||.|||||.|||||.|||||.|||||.
TTAAACATCCCAGTCTCAGAATTAGAATCAGCATTACAAATGGAACCAGCAGCATTTCAA

A L Y S A E K P K L E D E H L V F F C Q      80
gctttatattctgctgagaagccaaagctggaagatgagcatctcgttttcttctgtcag
||..|.|||||.|||||.|||||.|||||.|||||.|||||.|||||.|||||.|||||.
GCACCTTACTCCGCCGAAAAACCAAACTTGAAGATGAACACTTAGTATTTTTTTGTCAA

M G K R G L Q A T Q L A R S L G Y T G Y      100
atgggcaagcggggcctccaggccacgcagctggcccggagtcttgatacactgggtac
|||||.|||||.|||||.|||||.|||||.|||||.|||||.|||||.|||||.|||||.
ATGGGAAACGTGGTTTACAAGCAACACAATTAGCTCGCAGCTTAGGTTATACAGGATAT

G E V W L L A G R      109
ggggaggtgtggctgctagctgggagg
||.|||||.|||||.|||||.|||||.
GGAGAAGTTTGGTTATTAGCAGGTCGC

```

Figure S3 The nucleotide sequence of the synthetic gene used to express recombinant TSTD1 isoform 3 (upper case) is compared with the original gene sequence (lower case). The top line shows the amino acid sequence of isoform 3.

```

1  MAGAPTVSLPELRSLLASGRARLFDVRSREEAAAGTIPGALNIPVSELESALQMEPAAFQ 60
3  MAGAPTVSLPELRSLLASGRARLFDVRSREEAAAGTIPGALNIPVSELESALQMEPAAFQ 60
2  MAG-----VSELESALQMEPAAFQ 19
***                                     *****

1  ALYSAEKPKLEDEHLVFFCOMGKRGLQATQLARSLGYTGGARNYAGAYREWLEKES 115
3  ALYSAEKPKLEDEHLVFFCOMGKRGLQATQLARSLGYTG-----YGEVWLLAGR 109
2  ALYSAEKPKLEDEHLVFFCOMGKRGLQATQLARSLGYTGGARNYAGAYREWLEKES 74
*****                                     **

```

Figure S4 Alignment of human TSTD1 isoforms. Amino acids encoded across a splice junction and cysteines are highlighted in yellow and red, respectively. All isoforms contain a tripeptide at the N-terminus and a central core of 55 amino acids that are encoded by exons 1 and 3, respectively. The N-terminal tripeptide in isoforms 1 and 3 is followed by a stretch of 41 amino acids (encoded by exon 2) that is absent in isoform 2. The 16 amino acids at the C-terminus of isoforms 1 and 2 (encoded by exon 4) are replaced by a decapeptide in isoform 3 (encoded by retained intron 3).

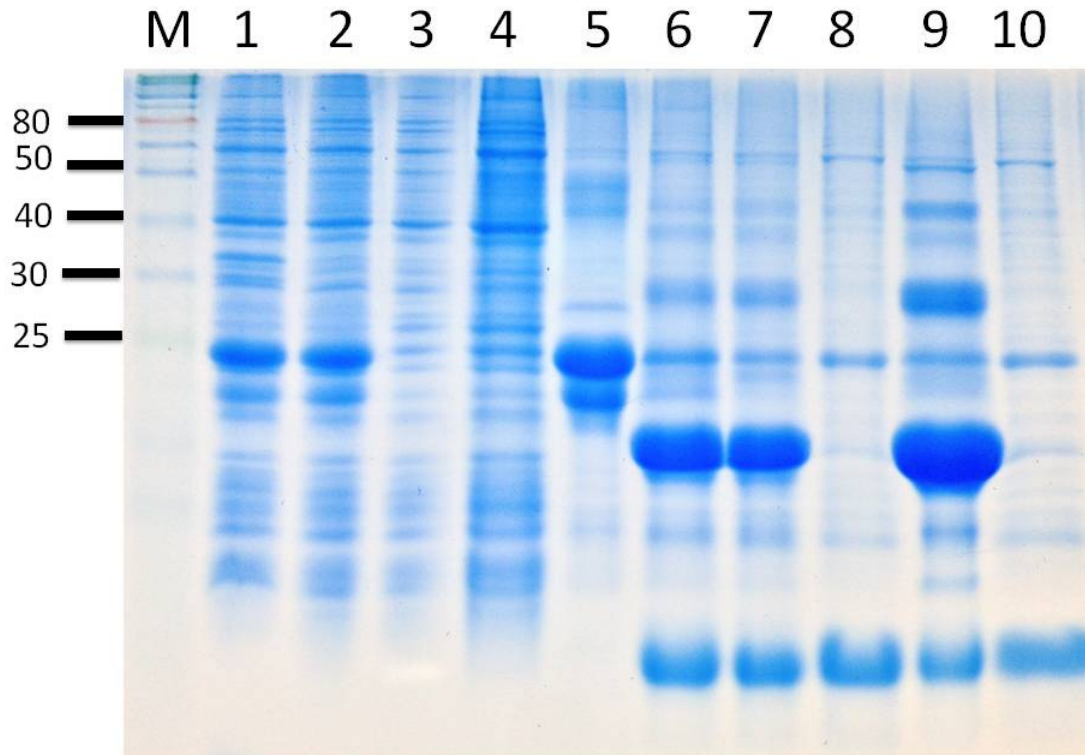

Figure S5 Purification of recombinant human TSTD1 isoform 2 with a cleavable N-terminal His-SUMO tag. The SDS 15% polyacrylamide gel was stained for protein with ProSieve Blue Protein Staining Solution (Lonza); lane M, molecular markers; lane 1, whole cell lysate; lane 2, low speed supernatant; lane 3, Ni affinity column flow-through; lane 4, Ni affinity column wash; lane 5, Ni affinity column eluate; lane 6, Ni affinity column eluate after cleavage with SUMO hydrolase; lane 7, SUMO hydrolase-treated sample after dialysis; lane 8, second Ni affinity column flow-through; lane 9, second Ni affinity column eluate; lane 10, dialyzed sample from lane 8.



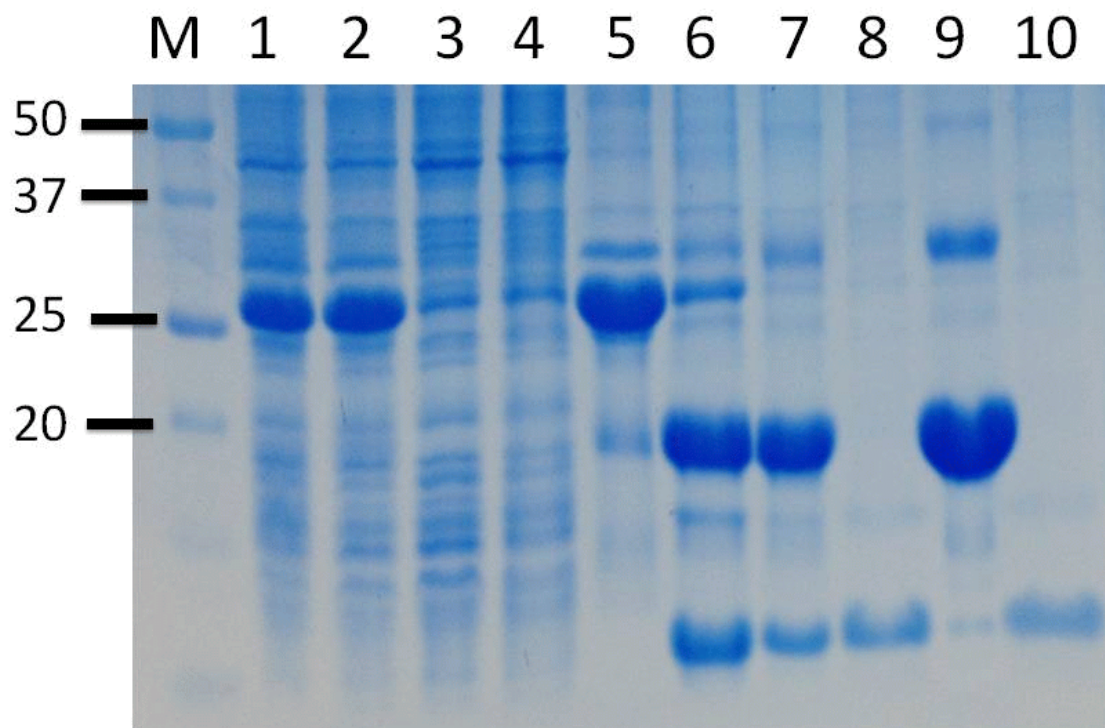

Figure S6 Purification of recombinant human TSTD1 isoform 3 with a cleavable N-terminal His-SUMO tag. The SDS 15% polyacrylamide gel was stained for protein with ProSieve Blue Protein Staining Solution (Lonza); lane M, molecular markers; lane 1, whole cell lysate; lane 2, low speed supernatant; lane 3, Ni affinity column flow-through; lane 4, Ni affinity column wash; lane 5, Ni affinity column eluate; lane 6, Ni affinity column eluate after cleavage with SUMO hydrolase; lane 7, SUMO hydrolase-treated sample after dialysis; lane 8, second Ni affinity column flow-through; lane 9, second Ni affinity column eluate; lane 10, dialyzed sample from lane 8.

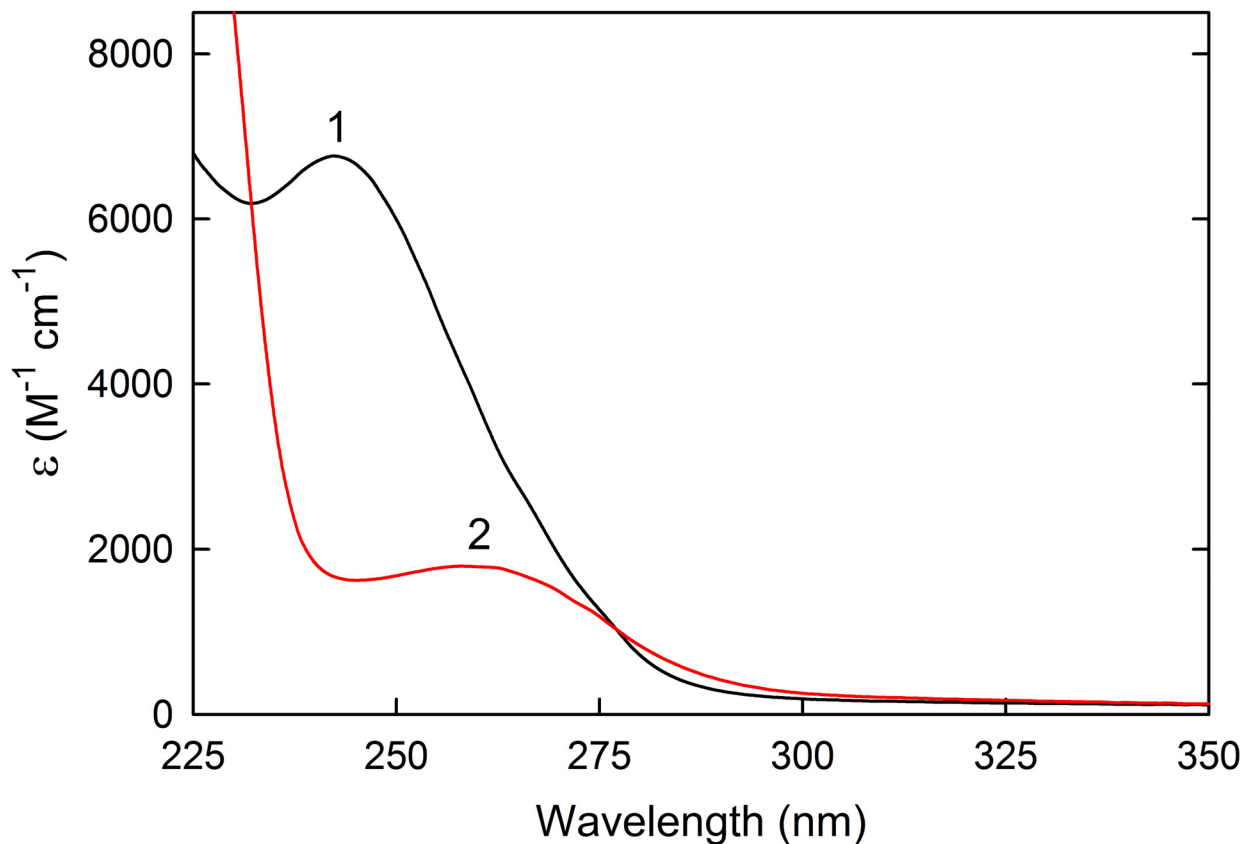

Figure S7 Spectral properties of *p*-toluenethiosulfonate ( $p\text{-Tol-SO}_2\text{S}^-$ ) and *p*-toluenesulfonite ( $p\text{-Tol-SO}_2^-$ ). Spectra were recorded at 25 °C using a 2 mm cuvette. Curve 1 is the absorption spectrum of  $p\text{-Tol-SO}_2\text{S}^-$  in 50 mM potassium/sodium phosphate buffer, pH 8.0, recorded 2 s after addition of 1.6 mM potassium cyanide. Curve 2 is the absorption spectrum of  $p\text{-Tol-SO}_2^-$  in the same buffer, recorded 190 s after addition of 60 nM human rhodanese, an enzyme previously shown to catalyze the transfer of the sulfane sulfur from  $p\text{-Tol-SO}_2\text{S}^-$  to cyanide (Sorbo, B. (1953) Acta Chem. Scand. 7, 32-37).

|                  |                                                                |     |
|------------------|----------------------------------------------------------------|-----|
| N. oceani        | MIFRQLFDPESSSTYTYLIGDPATKEAVFIDPVNTRVDEYLNLLNKYNLKLKYSLETHAHA  | 60  |
| M. silvestris    | MIFRQLFDHVSGETYTYLLASRPGGALIIDPVLEKVDRYLQLFDELVDKLVKAVDTHLHA   | 60  |
| M. tundripaludum | MLFKQLFDQETWYTYTYLIADPVSKDAILIDPVNTHIDEYIELLAHGLQLKYSLETHVHA   | 60  |
| M. album         | MIFKQLFDPEETWYTYTYFIADTDAKEAVLIDPVKSHIDEYIALLDEHGLKLYTLETHVHA  | 60  |
| M. morosus       | MLFKQLFDQETWYTYTYLIADPANKEAVLIDPVNTHIDYLAAMLTEQGLQLKYLETHVHA   | 60  |
|                  | *:*:**** : ****:.. :*:**** ::* *: : : :*: :*:** **             |     |
| N. oceani        | DHITASGLLRQHTGAKTGIGQACGAQYADYQLKDGVVLAFFGQEEIKVLATPGHTPGSIS   | 120 |
| M. silvestris    | DHVTGLGALRDRTHCITVMGEQTKADVVS MRVADGDRIDIE-GLSLEALFTPGHTDSDYS  | 119 |
| M. tundripaludum | DHITASGLLRQRLGAQTAVSGLCGAESADIQIQDGDIFKFAGDEQIKVIATPGHTRGSIS   | 120 |
| M. album         | DHITASGLLRQKLGAEETGVQLCGAIGADLQDGDVLEFGNGEKIKVIATPGHTQGSVS     | 120 |
| M. morosus       | DHITASGLLRQKLGSGTGVGALCGAETADFQMKDGLFSFTNGEQIKVIATPGHTKGSMS    | 120 |
|                  | **:* . * **:: . * .. * .. : : ** : : : : : : : ***** **        |     |
| N. oceani        | YLWRDRVFTGDALLINGCGRITDFQGGDPTLYDSVTQKLFPLPGETIVYPGHYNGRWVS    | 180 |
| M. silvestris    | FLEGRVFTGDTLLIRGTGRITDFQNGDPRAYHSIFDRLLKLPDETLVYPAHDYKGDTVS    | 179 |
| M. tundripaludum | FLWRDLFTGDSLLIGGCGRTDFQGGDAGALYDCITQRLFTLPDETLVYPGHYQQRWVS     | 180 |
| M. album         | FLWRDRVFTGDSLFIGGCGRTDFQSGDAGALYDCITRKLFTLPDETLVYPGHYQQRWVS    | 180 |
| M. morosus       | FLWRDRVFTGDSLFIGGCGRTDFQGGDAGALYDCITQRLFTLPDDTLVYPGHYQQRWVS    | 180 |
|                  | :* . *:****:*:* * ***** ** :*.. :*:..** :*:****.***: **        |     |
| N. oceani        | SVEQERTGNRLAGKTRAFFIEIMNNLNLPKPRLIDEAVPANRRCGLTEEE-----IRQD    | 238 |
| M. silvestris    | TIGERLRFNPRKLVRSVDEYVDLMNNLNLPNPKMMDVAVPANMRVGFHQDE-----IARKG  | 239 |
| M. tundripaludum | SIMQERTTNPRLAGKTRQFFIEIMNNLNLPKPRLIDEAVPANRYCGLDENERQDAVALRD   | 240 |
| M. album         | SIMQERITNPRLAGKTRREEFFIEIMNNLNLPRPRLIDEAVPANRYCGLDEDERQDAVARRD | 240 |
| M. morosus       | NIVQERTTNPRLAGKTRDEFITIMNNLNLPKPKLIDEAVPANRYCGLLENERQDAVAHRE   | 240 |
|                  | .. :** * ** : : : : :*****.*:~* ***** * : :*                   |     |
| N. oceani        | TMMG-----EKRVSFQDLVQEARQVREIDVATVKQRLGDKGKTAIID                | 278 |
| M. silvestris    | WAAQ-----AAEALALFGRPDIAIVD                                     | 256 |
| M. tundripaludum | A-----SLPVRATTRTEDMVAEAKQHIVEIDVAKSKQLLTKGNVVLVD               | 283 |
| M. album         | STR-----PERAMISAQDLVSAAKERITEIGIDKARQLLNQSGVAVVD               | 283 |
| M. morosus       | TVRESAKPGDVPVVNCGGDMPKSGGMTVQDLVAAAKQOITEVNVKAKQLIVQGSITVID    | 300 |
|                  | : : : *                                                        |     |
| N. oceani        | VREPEEFAA-GHLPGAINVPRGVLEFRLG--NTAELADPNIPITILYCQTGGRAALAAWS   | 334 |
| M. silvestris    | LREKREKQGIIPGSLHAPYDLRESIGPGGALHELAAAGKTIILFYCAFGERSAMAVQA     | 316 |
| M. tundripaludum | TREESEYAA-GHVDGALLVPRGMLEFKIG--NMPELADKSKAVLIYCR LGNRSALAAQT   | 339 |
| M. album         | VREESEYAA-GHIDNALPIPRGVLEFKVG--ATPELADKSKTVVVYCR TGGRAALAAQT   | 339 |
| M. morosus       | TREESEYAA-GHIDNAVLLPRGVLEFRIN--TIPELADKAKPVLIIYCR TGGRAALAAQS  | 356 |
|                  | ** * * : : : * * . : : ** : : ** * * :*:* . :                  |     |
| N. oceani        | LKCLGYTDATLIAGGYDAWRAAKQNAD-                                   | 361 |
| M. silvestris    | AQDAGFKSARHIAGGFDAWKKENGAVAP                                   | 344 |
| M. tundripaludum | LQQLGYTNVLSMAGGF EAWKKSQEAEE--                                 | 365 |
| M. album         | LQNLGYSNVLSIAGGYEAWQKSL-----                                   | 362 |
| M. morosus       | LKTLGYTNVLSIAGGYETWQKGN-----                                   | 379 |
|                  | : * :... :****:~*:                                             |     |

Figure S8 Multiple sequence alignment of selected SDO-TSTD1 bacterial fusion proteins. The black box marks a poorly conserved, variable length linker (9 to 52 amino acids) between the N-terminal SDO-like domain (230 or 231 amino acids) and the C-terminal TSTD1-like domain (96 to 105 amino acids). GenBank accession numbers: *Nitrosococcus oceani* (WP\_013220760.1); *Methylocella silvestris* (WP\_012591638.1); *Methylobacter tundripaludum* (WP\_006892756.1); *Methylobacterium album* (WP\_005371248.1); *Methyloglobulus morosus* (WP\_023495230.1).

### A) N-terminal SDO-like Domain

|                  |                                                                                                                                                                                    |     |
|------------------|------------------------------------------------------------------------------------------------------------------------------------------------------------------------------------|-----|
| N. oceani        | -----MIFRQ <sup>Y</sup> LFDPESSTY <sup>T</sup> TYLLIGDPATKEAVFIDP <sup>N</sup> TRVDE                                                                                               | 38  |
| M. silvestris    | -----MIFRQ <sup>L</sup> LDHVS <sup>G</sup> TYYTLLASRPGGEALIDP <sup>V</sup> LEKVDR                                                                                                  | 38  |
| M. tundripaludum | -----MLFKQ <sup>L</sup> LDQETWTYYTYLIADPVSKDALLIDP <sup>V</sup> NTHIDE                                                                                                             | 38  |
| M. album         | -----MIFKQ <sup>L</sup> LDPE <sup>T</sup> WTYYTYFIADTAKEAVLIDP <sup>V</sup> KSHIDE                                                                                                 | 38  |
| M. morosus       | -----MLFKQ <sup>L</sup> LDQETWTYYTYLIADPANKEAVLIDP <sup>V</sup> NTHIDD                                                                                                             | 38  |
| Human SDO        | MAEAVL <sup>R</sup> VARRQLSQRGGSGAPILLRQMFEPVSC <sup>T</sup> FYYLLGDR <sup>S</sup> REAVLIDP <sup>V</sup> LETAPR                                                                    | 60  |
|                  | : : : : * : : : * : : * : : : * : : *                                                                                                                                              |     |
| N. oceani        | YLNLLN <sup>K</sup> Y <sup>N</sup> LKLYSL <sup>E</sup> THAHAD <sup>H</sup> ETASGLLRQHT-GAKTGI <sup>G</sup> QACGAQYADYQ <sup>L</sup> KDGVV                                          | 97  |
| M. silvestris    | YLQLFDEL <sup>D</sup> VKLKAVD <sup>T</sup> HLHAD <sup>H</sup> V <sup>T</sup> GLGALDRDT-HCITV <sup>M</sup> GEQTKADVSMRVADGDR                                                        | 97  |
| M. tundripaludum | YIELLAH <sup>G</sup> LQ <sup>L</sup> KYSL <sup>E</sup> THVHAD <sup>H</sup> ETASGLLRQRL-GAQTAVSGLCGAE <sup>S</sup> ADIQ <sup>I</sup> QD <sup>G</sup> DI                             | 97  |
| M. album         | YIALLDEH <sup>G</sup> LKLKY <sup>T</sup> LE <sup>T</sup> THVHAD <sup>H</sup> ETASGLLRQKL-GAETG <sup>V</sup> GQLCGAIGADLQ <sup>L</sup> QD <sup>G</sup> DV                           | 97  |
| M. morosus       | YLAMLTEQ <sup>G</sup> LQ <sup>L</sup> KY <sup>T</sup> LE <sup>T</sup> THVHAD <sup>H</sup> ETASGLLRQKL-GSQTG <sup>V</sup> GALCGAETAD <sup>F</sup> Q <sup>M</sup> KD <sup>G</sup> DL | 97  |
| Human SDO        | DAQLIKELGLRLLYAVNT <sup>H</sup> CHAD <sup>H</sup> ETGSGLLR <sup>S</sup> LLPGCQSVIS <sup>R</sup> LSGA-QADL <sup>H</sup> IED <sup>G</sup> DS                                         | 119 |
|                  | : : * : : * : : * : : * : : * : : *                                                                                                                                                |     |
| N. oceani        | LAFGQGE <sup>E</sup> IKVLATPGHTPGSISYLWRDR--VFTGDALLINGCGR <sup>T</sup> DFQGGDPG <sup>T</sup> LYDSV                                                                                | 155 |
| M. silvestris    | IDI-EGL <sup>S</sup> LEALF <sup>T</sup> PGHTDDSY <sup>S</sup> FLEGR--VFTGDTLLIRGTG <sup>R</sup> TDFQNGDPRAQYHSI                                                                    | 154 |
| M. tundripaludum | FKFAGDEQ <sup>I</sup> KVIATPGHTRG <sup>S</sup> ISF <sup>L</sup> WRDR--LFTGDSLLIGGCGR <sup>T</sup> DFQGGDAGALYDCI                                                                   | 155 |
| M. album         | LEFGN <sup>E</sup> E <sup>K</sup> IKVIATPGHTQGSVS <sup>F</sup> LRDR--VFTGDSLFIGGCGR <sup>T</sup> DFQSGDAGALYDCI                                                                    | 155 |
| M. morosus       | FSFTN <sup>G</sup> EQ <sup>I</sup> KVIATPGHTKGSMS <sup>F</sup> LRDR--VFTGDSLFIGGCGR <sup>T</sup> DFQGGDAGALYDCI                                                                    | 155 |
| Human SDO        | IRFGRFA-LETRAS <sup>P</sup> GHTPGCVTFVLNDSMAFTGDALLIRGCGR <sup>T</sup> DFQGGCAKTLYHSV                                                                                              | 178 |
|                  | : : : : * : : * : : : : * : : * : : * : : *                                                                                                                                        |     |
| N. oceani        | TQKLFTLPGETIVYPGH <sup>D</sup> YNGRWVSSVEQERTGN <sup>R</sup> L <sup>G</sup> KTRAEFIEIMNNLNLPK <sup>R</sup> LI                                                                      | 215 |
| M. silvestris    | FDRL <sup>L</sup> KL <sup>P</sup> DELTVYPADYKGD <sup>T</sup> VSTIGEERLFNPRLK <sup>V</sup> RSVDEYVDLMNNLNLPK <sup>M</sup> M                                                         | 214 |
| M. tundripaludum | TQRLFTLPDELTVYPGH <sup>D</sup> YQQRWVSSIMQERTTNPRL <sup>G</sup> KTR <sup>E</sup> QFIEIMNNLNLPK <sup>R</sup> LI                                                                     | 215 |
| M. album         | TRK <sup>L</sup> FTLPDELTVYPGH <sup>D</sup> YQQRWVSSIMQERITNPR <sup>L</sup> GKTR <sup>E</sup> E <sup>F</sup> IEIMNNLNLPK <sup>R</sup> LI                                           | 215 |
| M. morosus       | TQRLFTLPDDTLVYPGH <sup>D</sup> YQQRWVSNIVQERTTNPRL <sup>G</sup> KTR <sup>D</sup> E <sup>F</sup> ITIMNNLNLPK <sup>P</sup> LI                                                        | 215 |
| Human SDO        | HEKIFTLPGDCLIPADYHGFTVSTVEERTLN <sup>P</sup> RLTL-SCEE <sup>F</sup> VKIMGNLNLPK <sup>P</sup> QI                                                                                    | 237 |
|                  | : : * : : * : : * : : * : : * : : *                                                                                                                                                |     |
| N. oceani        | DEAVPANRRCGLTEEE-                                                                                                                                                                  | 231 |
| M. silvestris    | DVAVPANMRVGFHQDE-                                                                                                                                                                  | 230 |
| M. tundripaludum | DEAVPANRYCGLDENE-                                                                                                                                                                  | 231 |
| M. album         | DEAVPANRYCGLDEDE-                                                                                                                                                                  | 231 |
| M. morosus       | DEAVPANRYCGL <sup>E</sup> ENE-                                                                                                                                                     | 231 |
| Human SDO        | DFAVPANMR <sup>C</sup> GVQTPTA                                                                                                                                                     | 254 |
|                  | * ***** *                                                                                                                                                                          |     |

### B) C-terminal TSTD1-like Domain

|                  |                                                                                                                                                                                               |     |
|------------------|-----------------------------------------------------------------------------------------------------------------------------------------------------------------------------------------------|-----|
| N. oceani        | -----VATV <sup>K</sup> QR <sup>L</sup> LDG <sup>K</sup> TAIIDVREPEFAA-GHLPGA <sup>I</sup> NVPRGVLE <sup>F</sup> R <sup>L</sup> G---NT-                                                        | 308 |
| M. silvestris    | -----AAEALALFR <sup>P</sup> DIATV <sup>D</sup> LREKREKQGIIPGSLHAPY <sup>P</sup> DLRESIG <sup>P</sup> GGALH                                                                                    | 290 |
| M. tundripaludum | -----VAKSKQL <sup>L</sup> TKGN <sup>V</sup> VLD <sup>T</sup> REESEYAA-GHVDGALLVPRG <sup>M</sup> LE <sup>F</sup> K <sup>I</sup> G---NM-                                                        | 313 |
| M. album         | -----IDKARQLN <sup>Q</sup> SGVA <sup>V</sup> VDVRESEYAA-GHIDNALPIPRGV <sup>L</sup> E <sup>F</sup> KV <sup>G</sup> ---AT-                                                                      | 313 |
| M. morosus       | -----VEKAKQLIVQ <sup>S</sup> ITVID <sup>T</sup> REESEYAA-GHIDNAVLLPRGVLE <sup>F</sup> FRIN---TI-                                                                                              | 330 |
| Human TSTD1      | MAGAPT <sup>V</sup> SLPEL <sup>R</sup> SLLASGRAR <sup>L</sup> FD <sup>V</sup> RSREAAA-GTIPGALNIPVSE <sup>L</sup> SAL <sup>Q</sup> MEPA <sup>A</sup> F                                         | 59  |
|                  | : : * : : * : : * : : * : : *                                                                                                                                                                 |     |
| N. oceani        | -----AELADPNIP <sup>I</sup> I <sup>L</sup> Y <sup>C</sup> QTGGR <sup>A</sup> ALA <sup>A</sup> WSL <sup>K</sup> CLGY <sup>T</sup> DAT <sup>L</sup> IAGGYDA <sup>W</sup> RAAKQ <sup>N</sup> AD- | 361 |
| M. silvestris    | -----ELAAAGKTILFYCAFGR <sup>S</sup> AMAVQA <sup>A</sup> QDAG <sup>F</sup> K <sup>S</sup> ARHIAGGFDA <sup>W</sup> KKENGAV <sup>A</sup> P                                                       | 344 |
| M. tundripaludum | -----PELADKSKAVLIY <sup>C</sup> R <sup>L</sup> GN <sup>R</sup> SALAAQ <sup>T</sup> LQQLGY <sup>T</sup> NVLSMAGGF <sup>E</sup> AWK <sup>K</sup> SQ <sup>E</sup> EAE--                          | 365 |
| M. album         | -----PELADKSK <sup>T</sup> VV <sup>V</sup> Y <sup>C</sup> RTGGR <sup>A</sup> ALAAQ <sup>T</sup> LQNLGYSNVLSIAGGYE <sup>A</sup> W <sup>K</sup> S <sup>L</sup> -----                            | 362 |
| M. morosus       | -----PELADKAKPVI <sup>L</sup> Y <sup>C</sup> RTGGR <sup>A</sup> ALAAQ <sup>S</sup> LK <sup>T</sup> LG <sup>Y</sup> TN <sup>V</sup> LSIAGGYE <sup>T</sup> W <sup>K</sup> GN-----               | 379 |
| Human TSTD1      | QALYSAEK <sup>P</sup> K <sup>L</sup> E <sup>H</sup> LVEFF <sup>C</sup> QMK <sup>R</sup> GLQATQLARSLGY <sup>T</sup> GARNYAGAY <sup>R</sup> E <sup>W</sup> LEKES----                            | 115 |
|                  | : : : * : : * : : * : : * : : *                                                                                                                                                               |     |

Figure S9 Multiple sequence alignment of human SDO or human TSTD1 with the N-terminal SDO-like or the C-terminal TSTD1-like domain, respectively, in selected bacterial SDO-TSTD1 fusion proteins. Panel A: The black box marks a  $\beta$ -lactamase signature motif. Conserved metal binding and glutathione binding sites, identified in previous studies (Zhang et al. (2013) PLOS ONE, 8, e81885), are highlighted in yellow and magenta, respectively. Panel B: The black boxes mark a six amino acid active site loop and a rhodanese homology domain signature motif. GenBank accession numbers: *Nitrosococcus oceani* (WP\_013220760.1); *Methylocella silvestris* (WP\_012591638.1); *Methylobacter tundripaludum* (WP\_006892756.1); *Methylomicrobium album* (WP\_005371248.1); *Methyloglobulus morosus* (WP\_023495230.1).
